# Supplementary material
Source: PubMed Central journal article supplement (PMC1735913)
Supplement: jmedgene_42_1_58__1.pdf [file jmedgene_42_1_58__1.pdf]

**Table 1s. Primers used to amplify the *SLC7A9* exons for DHPLC analysis**

The size of the amplified fragment and the resolution temperature (Tr) is indicated.

| <b>Fragment</b> | <b>exon</b> | <b>Sequence (5' -&gt; 3')</b>                            | <b>Size (bp)</b> | <b>Tr (°C)</b> |
|-----------------|-------------|----------------------------------------------------------|------------------|----------------|
| 1               | 2           | For: ATGACTGACTTTGACTCTGGG<br>Rev: TCTTCTGCCGTGTCAATAGGG | 258              | 63             |
| 2               | 3           | For: CGCCCTCTTCCTTCCTCC<br>Rev: TAGCAGCTGCCTGGCGTG       | 266              | 64/63          |
| 3               | 4           | For: AGCCTCCGGTGGGAGGAAG<br>Rev: GAGTCCCCAGACACCCTCTG    | 230              | 64             |
| 4               | 4           | For: AAAGGAGACTCTCTCCAGGG<br>Rev: AGCCCATCTCCAAGGAAGCA   | 244              | 64             |
| 5               | 5           | For: TCCCGTGGAGATACACACTCA<br>Rev: TGGAGTTAAAGTCACCTGGAG | 310              | 63             |
| 6               | 6           | For: AGTCAAGGTGTGTGACGCTTG<br>Rev: AGGAGAAGAGAAATCAGGCTG | 252              | 61             |
| 7               | 7           | For: CTGAACGTGGGTCTCCGTG<br>Rev: ACCTCCAGTGCTGACACCTG    | 161              | 59             |
| 8               | 8           | For: GACCCTCAGGACTCATCTCG<br>Rev: TAGCTGTGTGTCTTCCTCGGG  | 255              | 63             |
| 9               | 9           | For: GGAGCACAAGTCCTCAGTGG<br>Rev: GCCTTGAAGATAGGCTGGTAG  | 236              | 61             |
| 10              | 10          | For: ATGACTGACTTTGACTCTGGG<br>Rev: TCTTCTGCCGTGTCAATAGGG | 230              | 60             |
| 11              | 11          | For: TTCGGTCTTCTGTGACATGAG<br>Rev: AGCCACTCGTGACTCTGGG   | 272              | 58             |
| 12              | 12          | For: ATGATTGAAATTGGAGGAGGG<br>Rev: TGGAGTCAGGACAGGTGAGG  | 390              | 60             |
| 13              | 13          | For: CCTCACCCACAACA ACTCC<br>Rev: AAATTCAGCTGACTTGGCTAC  | 231              | 59             |
