# Supplementary material
Source: PubMed Central journal article supplement (PMC1735913)
Supplement: jmedgene_42_1_58__2.pdf [file jmedgene_42_1_58__2.pdf]

**Table 2s Primers used to amplify the *SLC7A9* exons together with the external double dose control *DSCR1* gene**

Amount refers to picomoles of each pair of primers per 20  $\mu$ l reaction. \*) Primers labeled with FAM fluorescence (Lifetechnologies). *DSCR1* primers are used as a double dosage control.

| Exon    | Name       | Sequence (5' -> 3')    | Size (pb) | Amount (pmoles) |
|---------|------------|------------------------|-----------|-----------------|
| 1       | P6IF1(-)*  | CATTTCTAGGGTTGGACCGTG  | 127       | 2.8             |
|         | P6IR1(-)   | GGCCAGGAGAGCCATGAG     |           |                 |
| 2       | P6IF1N     | ATGACTGACTTTGACTCTGGG  | 400       | 2               |
|         | P6IR1b*    | TCTTCTGCCGTGTCAGTAGG   |           |                 |
| 3       | P6IF2*     | CTCCTAATCTTTCTGTGCCTCA | 242       | 2.35            |
|         | P6IR2b     | GGTAGCAGCTGCCTGGCGT    |           |                 |
| 4       | P6F3*      | GGAGCTTGGCACAATGATCAC  | 328       | 2.1             |
|         | P6IR3c     | GCTCTCACCAGAGACTCACT   |           |                 |
| 5       | P6F4*      | CTTCCAGTGTTTCATCTCGACA | 98        | 2.6             |
|         | P6R13      | ATGGCCACGATCACCAGCTTG  |           |                 |
| 6       | P6IF5      | TCCCGTGGAGATACTCA      | 267       | 1.85            |
|         | P6IR5*     | CCCAGAAAGGAGAACTCATTGT |           |                 |
| 7       | P6IF6      | AGTCAAGGTGTGTGACGCTTG  | 143       | 1.5             |
|         | P6IR6*     | CAGGAGAAGAGAAATCAGGCT  |           |                 |
| 8       | P6D8       | CGGCGTGCTACATCCTCATGA  | 163       | 1.15            |
|         | P6IR7*     | CAGGAGAAGAGAAATCAGGCT  |           |                 |
| 9       | P6IF8      | GACCCTCAGGACTCATCTCG   | 217       | 1.35            |
|         | P6IR8*     | TAGCTGTGTGTCTTCCTCGG   |           |                 |
| 10      | P6IF9*     | GGAGCACAAGTCCTCAGTGG   | 211       | 2.1             |
|         | P6IR9      | GCCTTGAAGATAGGCTGGTAG  |           |                 |
| 11      | P6IF10*    | TTCGGTCTTCTGTGACATGAG  | 323       | 2.75            |
|         | P6IR10b    | GTCAGATTGGAAGTAGAAGGCA |           |                 |
| 12      | P6IF11     | ATGATTGAAATTGGAGGAGGG  | 192       | 1.5             |
|         | P6IR11*    | GCTTGCTGATGATTGGAGCCA  |           |                 |
| 13      | P6IF12*    | CCCTCACCCACAACAACCTCC  | 180       | 2.2             |
|         | P6IR12     | AAATTCAGCTGACTTGGCTAC  |           |                 |
| Control | DSCR1-E5F  | GTCAAGGGTCATATGCAGGTA  | 247       | 1.9             |
| (DCSR1) | DSCR1-E5R* | GAACCCAACCTCACCTGAGCA  |           |                 |
