# Supplementary material
Source: PubMed Central journal article supplement (PMC1735913)
Supplement: jmedgene_42_1_58__3.pdf [file jmedgene_42_1_58__3.pdf]

**Table 3. Cystinuria-specific mutated alleles identified in the 164 probands studied of the International Cystinuria Consortium (ICC) database.**

One M467T allele (*SLC3A1*) and one c.789+2T>C allele (*SLC7A9*) are not included because they are the third mutated allele in patients BB(A) and AA(B) respectively. \*) Two mutations in the same chromosome. #) Renamed *SLC7A9* mutations following The Human Genome Variation Society nomenclature ([www.genomic.unimelb.edu.au/mdi/mutnomen/](http://www.genomic.unimelb.edu.au/mdi/mutnomen/)) (e.g., for the common mutation c.800-801insA, also named c.799-800insA, the new name is c.614dupA). \$) Two c.604+1G>A alleles have been considered in one patient even though hemizygosity due to deletion in the other *SLC7A9* allele is not discharged. &) *SLC3A1* deletions with unidentified boundaries. (n), number of independent alleles. F, frequency. Previous identified mutations in the ICC database shown in this table have been published elsewhere <sup>2,7,8,15,16,17,18</sup>.

| Type A mutations ( <i>SLC3A1</i> ) |                                             |     |       | Type B mutations ( <i>SLC7A9</i> ) |                                             |     |       |
|------------------------------------|---------------------------------------------|-----|-------|------------------------------------|---------------------------------------------|-----|-------|
| Nucleotide change                  | Amino acid change/<br>Predicted consequence | (n) | F     | Nucleotide change                  | Amino acid change/<br>Predicted consequence | (n) | F     |
| c.410A>G                           | D137G                                       | 1   | 0,008 | c.977+3A>T#                        | A290fsX45                                   | 1   | 0,006 |
| c.1699_1700 delAG                  | R567fsX8                                    | 1   | 0,008 | c.1265_1266 delTG                  | L424fsX62                                   | 1   | 0,006 |
| c.664delT                          | W222fsX3                                    | 1   | 0,008 | c.1399+1G>T                        | 447fsX22                                    | 1   | 0,006 |
| c.542G>A                           | R181Q                                       | 1   | 0,008 | c.475_477dupGCC#                   | A158dup                                     | 1   | 0,006 |
| c.1702G>A                          | G568L                                       | 1   | 0,008 | c.579_581dupCAT#                   | I193dup                                     | 1   | 0,006 |
| c.1998C>G                          | C666W                                       | 1   | 0,008 | c.151delT                          | S51fsX38                                    | 1   | 0,006 |
| c.1364C>T                          | S455L                                       | 1   | 0,008 | c.368_369 delCG#                   | T123fsX84                                   | 1   | 0,006 |
| c.1035G>A                          | D338fsX4                                    | 1   | 0,008 | c.501_504 delACTG#                 | L168fsX19                                   | 1   | 0,006 |
| c.1043A>C                          | H348P                                       | 1   | 0,008 | c.630_633 delTTTC#                 | F211fsX51                                   | 1   | 0,006 |
| c.446T>A                           | L149Q                                       | 1   | 0,008 | c.813delC#                         | N271fsX6                                    | 1   | 0,006 |
| c.368T>G                           | M123R                                       | 1   | 0,008 | c.376G>A#                          | A126T                                       | 1   | 0,006 |
| c.1690C>T                          | L564F                                       | 1   | 0,008 | c.947C>T                           | A316V                                       | 1   | 0,006 |
| c.1230C>A                          | N410K                                       | 1   | 0,008 | c.1144G>A#                         | A382T                                       | 1   | 0,006 |
| c.1865T>C,<br>c.1520C>T            | L622X,<br>S507L*                            | 1   | 0,008 | c.171C>T                           | N58_G79 del22                               | 1   | 0,006 |
| c.566C>T                           | T189M                                       | 1   | 0,008 | c.586C>T                           | L196_G202 delfsX5                           | 1   | 0,006 |

|                         |                                |   |       |                                     |                               |            |          |
|-------------------------|--------------------------------|---|-------|-------------------------------------|-------------------------------|------------|----------|
| c.1367G>A               | R456H                          | 1 | 0,008 | c.712_716<br>delCTCAA#              | N239fsX6                      | 1          | 0,006    |
| c.1966_1968<br>delCTT   | L656del                        | 1 | 0,008 | c.1224+4166_<br>c.1399+119del(4972) | K386fsX78                     | 1          | 0,006    |
| c.2019C>G               | C673W                          | 1 | 0,008 | c.1224+4166_<br>c.1399+119dup(4972) | V409fsX9                      | 1          | 0,006    |
| c.2033T>C               | L678P                          | 1 | 0,008 | c.187G>A#                           | G63R                          | 1          | 0,006    |
| c.1355G>A               | R452Q                          | 1 | 0,008 | c.131T>C#                           | I44T                          | 1          | 0,006    |
| c.1943T>C               | F648S                          | 1 | 0,008 | c.1400-3C>G                         | 447fsX22                      | 1          | 0,006    |
| c.1618_<br>2055del      | V540_<br>C685del               | 1 | 0,008 | c.847C>T                            | L283F                         | 1          | 0,006    |
| c.431_2055 del          | G144_<br>C685del               | 1 | 0,008 | c.155C>T#                           | P52L                          | 1          | 0,006    |
| c.766-2A>G              | L256_<br>K297del               | 1 | 0,008 | c.184G>A                            | V62M                          | 1          | 0,006    |
| c.1093C>T,<br>c.1955C>G | R365W,<br>T652R*               | 1 | 0,008 | c.206G>T#                           | W69L                          | 1          | 0,006    |
| c.371A>G                | Y124C                          | 1 | 0,008 | c.206G>A#                           | W69X                          | 1          | 0,006    |
| c.1383T>G               | Y461X                          | 1 | 0,008 | c.695A>G                            | Y232C                         | 1          | 0,006    |
| c.1744T>C               | Y582H                          | 1 | 0,008 | c.235+3_<br>c.235+293del            | L30fsX9                       | 1          | 0,006    |
| c.1012-23C>G            | D338_Y378<br>delfsX5           | 1 | 0,008 | c.1060G>A#                          | A354T                         | 1          | 0,006    |
| c.1221dupT              | P408fsX18                      | 1 | 0,008 | c.562G>A                            | V188M                         | 1          | 0,006    |
| c.503C>A                | S168X                          | 1 | 0,008 | c.604+1G>A \$ #                     | L160X                         | 2          | 0,013    |
| Del 3'                  | to be defined <sup>&amp;</sup> | 1 | 0,008 | c.604+2T>C                          | L160X                         | 2          | 0,013    |
| Del 5'                  | to be defined <sup>&amp;</sup> | 2 | 0,016 | c.209C>T#                           | A70V                          | 2          | 0,013    |
| c.1749delA              | T583fsX14                      | 2 | 0,016 | c.583G>A#                           | G195R                         | 2          | 0,013    |
| c.388T>C                | S130P                          | 2 | 0,016 | c.544G>A#,<br>c.1060G>A#            | A182T,<br>A354T*              | 2          | 0,013    |
| c.1447G>T               | E483X                          | 2 | 0,016 | c.775G>A#                           | G259R                         | 2          | 0,013    |
| c.1366C>T               | R456C                          | 2 | 0,016 | c.688T>C,<br>28_30del AGA#          | W230R,<br>R10del <sup>o</sup> | 3          | 0,019    |
| c.892-1332del           | E298_<br>M444del               | 2 | 0,016 | c.730_732<br>delGAA#                | E244del                       | 3          | 0,019    |
| c.266T>C                | L89P                           | 2 | 0,016 | c.605-3C>A                          | I203fsX27                     | 4          | 0,025    |
| c.1084C>T               | R362C                          | 2 | 0,016 | c.368G>A#                           | T123M                         | 6          | 0,038    |
| c.891+4A>G              | L256_K297del                   | 2 | 0,016 | c.544G>A#                           | A182T                         | 8          | 0,051    |
| c.1640C>G               | S547W                          | 2 | 0,016 | c.614dupA#                          | L160fsX1                      | 11         | 0,070    |
| c.451T>A                | Y151N                          | 2 | 0,016 | c.508G>A#                           | V170M                         | 18         | 0,115    |
| c.1093C>T               | R365W                          | 2 | 0,016 | c.997C>T#                           | R333W                         | 19         | 0,121    |
| c.1322C>G               | P441R                          | 3 | 0,024 | c.311G>A#                           | G105R                         | 43         | 0,274    |
| c.1353C>T               | R452W                          | 3 | 0,024 |                                     | <b>Total</b>                  | <b>157</b> | <b>1</b> |
| c.1400T>A               | M467K                          | 3 | 0,024 |                                     |                               |            |          |
| c.765+1G>T              | L256_K297del                   | 4 | 0,032 |                                     |                               |            |          |
| c.808C>T                | R270X                          | 5 | 0,040 |                                     |                               |            |          |
| c.163delC               | Q55fsX51                       | 5 | 0,040 |                                     |                               |            |          |

|              |                  |            |          |
|--------------|------------------|------------|----------|
| DupI4-I9     | E298_<br>D539dup | 5          | 0,040    |
| c.647C>T     | T216M            | 8          | 0,064    |
| c.1400T>C    | M467T            | 33         | 0,264    |
| <b>Total</b> |                  | <b>125</b> | <b>1</b> |
